# Supplementary material for: Mapping of Complete Set of Ribose and Base Modifications of Yeast rRNA by RP-HPLC and Mung Bean Nuclease Assay
Source: PLOS journal article supplement (doi:10.1371/journal.pone.0168873), 2016-12-29
Supplement: S1 (10.1371/journal.pone.0168873.s001) [file journal.pone.0168873.s001.pdf]

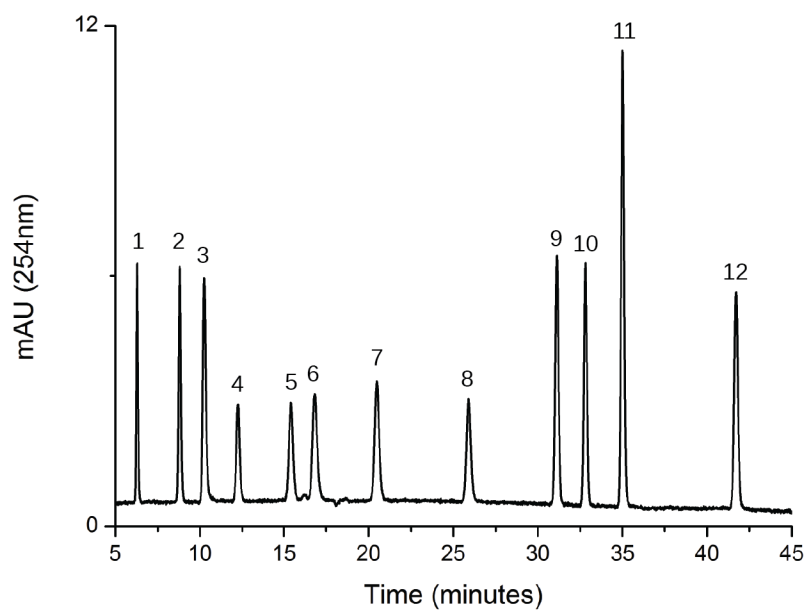

|   |   |                  |                  |    |                  |   |                  |    |                   |    |    |
|---|---|------------------|------------------|----|------------------|---|------------------|----|-------------------|----|----|
| 1 | 2 | 3                | 4                | 5  | 6                | 7 | 8                | 9  | 10                | 11 | 12 |
| C | U | m <sup>1</sup> A | m <sup>5</sup> C | Cm | m <sup>7</sup> G | G | m <sup>3</sup> U | Gm | ac <sup>4</sup> C | A  | Am |

**S1 Fig.** RP-HPLC chromatogram of a standard aqueous mixture of commercially available ribonucleosides. Identities of relevant peaks are mentioned in the table below.
