# Supplementary material for: Mapping of Complete Set of Ribose and Base Modifications of Yeast rRNA by RP-HPLC and Mung Bean Nuclease Assay
Source: PLoS One. 2016 Dec 29;11(12):e0168873. doi: 10.1371/journal.pone.0168873 (PMC5199042; doi:10.1371/journal.pone.0168873)
Supplement: S3 Table — (PDF) [file pone.0168873.s006.pdf]

**S3 Table. 18S rRNA fragments (isolated by Mung bean nuclease digestion) with their respective modifications profile.**

[illegible]
