# Supplementary material for: Mapping of Complete Set of Ribose and Base Modifications of Yeast rRNA by RP-HPLC and Mung Bean Nuclease Assay
Source: PLOS journal article supplement (doi:10.1371/journal.pone.0168873), 2016-12-29
Supplement: S4 (10.1371/journal.pone.0168873.s004) [file journal.pone.0168873.s004.pdf]

**S1 Table. Yeast strains used in the present study.**

| Strains       | Alias                     | Genotypes                                                                                                  | Source     |
|---------------|---------------------------|------------------------------------------------------------------------------------------------------------|------------|
| CEN.PK1255-1C | C1773G                    | Mat a ura3-52 trp1-289 leu2-3, 112 his3Δ1<br>ΔΔrdn::pNOY455 [HIS3] + pPK760(1-1) C1773G G1788C             | [1]        |
| CEN.SO15-4B   | Δsnr40                    | MATα ,ura3-52, his3-Δ1, leu2-3,112, trp1-289, MAL2-8c,<br>SUC2, snr40::loxP-kanMX4::LEU2-loxP              | [2]        |
| CEN.SO20-1A   | Δsnr41; Δsnr70,<br>Δsnr51 | MATα, ura3-52, his3-Δ1, leu2-3,112, trp1-289, MAL2-8c,<br>SUC2, snr41-snr70-snr51::loxP-kanMX4::HIS3-loxP  | [2]        |
| CEN.SO29-8C   | Δsnr56                    | MATα, ura3-52, his3-Δ1, leu2-3,112, trp1-289, MAL2-8c,<br>SUC2, snr56::loxP-kanMX4::HIS3-loxP              | [2]        |
| CEN.SO32-4A   | Δsnr57                    | MATα, ura3-52, his3-Δ1, leu2-3,112, trp1-289, MAL2-8c,<br>SUC2, snr57::loxP-kanMX4::URA3-loxP              | [2]        |
| CEN.PK1170-1C | C2278G                    | MATα ura3-52 trp1-289 leu2-3,112 his3Δ1<br>ΔΔrdn::pNOY455 [HIS3] + pPK655 (C2278G)                         | [3]        |
| CEN.PK1168-1C | A2142T                    | MATα ura3-52 trp1-289 leu2-3,112 his3Δ1<br>ΔΔrdn::pNOY455 [HIS3] + pPK623 (A2142T)                         | [4]        |
| CEN.PK1066-1C | A645T                     | MATα ura3-52 trp1-289 leu2-3,112 his3Δ1 MAL2-8 <sup>c</sup> SUC2<br>ΔΔrdn::pNOY455 [HIS3] + pPK618 (A645T) | [5]        |
| CEN.JY11-1B   | U2634G                    | MATα ura3-52 trp1-289 leu2-3,112 his3Δ1<br>ΔΔrdn::pNOY455 [HIS3] + pSJ05 (U2634G)                          | This study |
| CEN.JY12-4D   | U2843C                    | MATα ura3-52 trp1-289 leu2-3,112 his3Δ1 MAL2-8 <sup>c</sup> SUC2<br>ΔΔrdn::pNOY455 + pSJ06 (U2843C)        | This study |
| CEN.SH09      | G1575A                    | MATα ura3-52 trp1-289 leu2-3,112 his3Δ1 MAL2-8 <sup>c</sup> SUC2<br>ΔΔrdn::pNOY455 [HIS3] + pSJ09 (G1575A) | This study |
