# Supplementary material for: Mapping of Complete Set of Ribose and Base Modifications of Yeast rRNA by RP-HPLC and Mung Bean Nuclease Assay
Source: PLoS One. 2016 Dec 29;11(12):e0168873. doi: 10.1371/journal.pone.0168873 (PMC5199042; doi:10.1371/journal.pone.0168873)
Supplement: S4 Table — (PDF) [file pone.0168873.s007.pdf]

**S4 Table. 25S rRNA fragments (isolated by Mung bean nuclease digestion) with their respective modifications profile.**

| No.    | Ψ | Am | Cm | Gm | Um | m <sup>1</sup> A |
|--------|---|----|----|----|----|------------------|
| 25S-01 |   |    |    |    |    |                  |
| 25S-02 |   |    |    |    |    |                  |
| 25S-03 |   |    |    |    |    |                  |
| 25S-04 |   |    |    |    |    |                  |
| 25S-05 |   |    |    |    |    |                  |
| 25S-06 |   |    |    |    |    |                  |
| 25S-07 |   |    |    |    |    |                  |
| 25S-08 |   |    |    |    |    |                  |
| 25S-09 |   |    |    |    |    |                  |
| 25S-10 |   |    |    |    |    |                  |
| 25S-11 |   |    |    |    |    |                  |
| 25S-12 |   |    |    |    |    |                  |
| 25S-13 |   | 1  | 1  |    |    | 1                |
| 25S-14 |   |    | 1  |    |    |                  |
| 25S-15 |   |    |    |    |    |                  |
| 25S-16 | 1 | 1  |    | 1  |    |                  |
| 25S-17 |   | 1  |    |    |    |                  |
| 25S-18 |   | 1  |    | 2  | 1  |                  |
| 25S-19 | 1 |    |    |    |    |                  |
| 25S-20 | 5 |    |    |    |    |                  |
| 25S-21 | 4 |    |    |    |    |                  |
| 25S-22 | 2 |    |    |    |    |                  |
| 25S-23 | 2 | 1  |    | 1  |    |                  |
| 25S-24 |   |    |    |    |    |                  |
| 25S-25 |   |    |    |    |    |                  |
| 25S-26 |   |    |    |    |    |                  |
| 25S-27 |   |    |    |    |    |                  |
| 25S-28 |   |    |    |    |    |                  |
| 25S-29 |   | 1  | 1  | 1  |    |                  |
| 25S-30 |   |    |    | 1  |    |                  |
| 25S-31 |   |    |    |    |    |                  |
| 25S-32 |   |    |    |    |    |                  |
| 25S-33 |   |    |    |    |    |                  |
| 25S-34 |   |    |    |    |    |                  |

| No.    | Ψ | Am | Cm | Gm | Um | m <sup>1</sup> A | m <sup>3</sup> U | m <sup>5</sup> C |
|--------|---|----|----|----|----|------------------|------------------|------------------|
| 25S-35 |   |    |    |    |    |                  |                  |                  |
| 25S-36 |   |    |    |    |    |                  |                  |                  |
| 25S-37 |   |    |    |    |    |                  |                  |                  |
| 25S-38 |   |    |    |    | 1  |                  |                  |                  |
| 25S-39 |   |    |    |    |    |                  |                  |                  |
| 25S-40 |   |    |    |    |    |                  |                  |                  |
| 25S-41 |   |    |    |    |    |                  |                  |                  |
| 25S-42 |   |    |    |    |    |                  |                  |                  |
| 25S-43 | 2 |    |    |    |    | 1                |                  |                  |
| 25S-44 | 1 |    | 1  |    |    |                  |                  |                  |
| 25S-45 |   | 2  | 1  |    |    |                  |                  |                  |
| 25S-46 | 4 | 3  |    | 1  |    |                  |                  | 1                |
| 25S-47 | 4 |    | 1  |    | 1  |                  |                  |                  |
| 25S-48 | 1 |    |    |    |    |                  |                  |                  |
| 25S-49 | 1 |    |    |    | 2  |                  |                  |                  |
| 25S-50 |   |    |    |    |    |                  |                  |                  |
| 25S-51 |   |    |    |    |    |                  |                  |                  |
| 25S-52 |   |    |    |    |    |                  |                  |                  |
| 25S-53 |   | 1  |    | 1  |    |                  | 1                |                  |
| 25S-54 |   |    |    |    |    |                  |                  |                  |
| 25S-55 | 1 |    |    |    | 2  |                  |                  |                  |
| 25S-56 |   |    |    | 2  |    |                  |                  |                  |
| 25S-57 | 1 |    |    | 1  |    |                  | 1                |                  |
| 25S-58 | 1 |    |    |    |    |                  |                  | 1                |
| 25S-59 | 2 | 1  | 1  | 1  | 1  |                  |                  |                  |
| 25S-60 | 2 | 1  | 2  |    |    |                  |                  |                  |
| 25S-61 |   |    |    |    |    |                  |                  |                  |
| 25S-62 |   |    |    |    |    |                  |                  |                  |
| 25S-63 |   |    |    |    |    |                  |                  |                  |
| 25S-64 |   |    |    |    |    |                  |                  |                  |
| 25S-65 |   |    |    |    |    |                  |                  |                  |
| 25S-66 |   |    |    |    |    |                  |                  |                  |
| 25S-67 |   |    |    |    |    |                  |                  |                  |
| 25S-68 |   |    |    |    |    |                  |                  |                  |
