# Supplementary material for: Mapping of Complete Set of Ribose and Base Modifications of Yeast rRNA by RP-HPLC and Mung Bean Nuclease Assay
Source: PLOS journal article supplement (doi:10.1371/journal.pone.0168873), 2016-12-29
Supplement: S5 (10.1371/journal.pone.0168873.s005) [file journal.pone.0168873.s005.pdf]

**S2 Table. Oligonucleotides used in the present study for mung bean nuclease protection assay.**

| No.    | Sequence (5'-->3')                                          |
|--------|-------------------------------------------------------------|
| 18S-01 | GGCTTAATCTTTGAGACAAGCATATGACTACTGGCAGGATCAACCAGATA          |
| 18S-02 | GCCATTCGCAGTTTCACTGTATAAATTGCTTATACTTAGACATGCATGGC          |
| 18S-03 | TAGTAAAGGAAGTATCAAATAAACGATAACTGATTTAATGAGCCATTCGC          |
| 18S-04 | AAGCATGTATTAGCTCTAGAATTACCACAGTTATACCATGTAGTAAAGGA          |
| 18S-05 | TTATCTAATAAATACATCTCTTCCAAAGGGTCGAGATTTTAAGCATGTAT          |
| 18S-06 | GTTATTATGAATCATCAAAGAGTCCGAAGACATTGATTTTTTATCTAATA          |
| 18S-07 | GAATGAACCATCGCCAGCACAAGGCCATGCGATTCGAAAAGTTATTATGA          |
| 18S-08 | CACTATCCTACCATCGAAAGTTGATAGGGCAGAAATTTGAATGAACCATC          |
| 18S-09 | CGAACCTTATTCCCCGTTACCCGTTGAAACCATGGTAGGCCACTATCCT           |
| 18S-10 | CTTGGATGTGGTAGCCGTTTCTCAGGCTCCCTCTCCGGAATCGAACCTT           |
| 18S-11 | CTGAATTAGGATTGGGTAATTTGCGCGCCTGCTGCCTTCCTTGGATGTGG          |
| 18S-12 | CCGAATGGGCCCTGTATCGTTATTTATTGCTACTACCTCCCTGAATTAGG          |
| 18S-13 | GTTAAGGTATTTACATTGTACTCATTCCAATTACAAGACCCGAATGGGCC          |
| 18S-14 | CGCGGCTGCTGGCACCAGACTTGCCTCCAATTGTTCTCGTTAAGGTAT            |
| 18S-15 | CTGCAACAACCTTAATATACGCTATTGGAGCTGGAATTACCGCGGCTGCT          |
| 18S-16 | CCGGCAACCGGGCCAAAGTTCAACTACGAGCTTTTAACTGCAACAAC             |
| 18S-17 | GAAAGGCCCGTTGGAAATCCAGTACACGAAAAAATCGGACCGGCCAAC            |
| 18S-18 | GGTTCGCCAAGAGCCACAAGGACTCAAGGTTAGCCAGAAGGAAAGGCCCC          |
| 18S-19 | GCCTGCTTTGAACACTCTAATTTTTTCAAAGTAAAAGTCTGTTTCGCCA           |
| 18S-20 | TCCTATTCTATTATTCATGCTAATATATTCGAGCAATACGCCTGCTTTG           |
| 18S-21 | CATTACGATGGTCTAGAAACCAACAAAATAGAACCAACGTCCTATTCT            |
| 18S-22 | CAATTGAATACTGATGCCCCGACCGTCCCTATTAATCATTACGATGGTC           |
| 18S-23 | GTAGTTAGTCTTCAATAAATCCAAGAATTTACCTCTGACAATTGAATAC           |
| 18S-24 | TTCTTGATTAATGAAAACGTCCTTGGCAAATGCTTTCGCAGTAGTTAGTC          |
| 18S-25 | CTACGACGGTATCTGATCATCTTCGATCCCCTAACTTTGTTCTTGATTA           |
| 18S-26 | CACCACCGATCCCTAGTCGGCATAGTTTATGGTTAAGACTACGACGGTA           |
| 18S-27 | CTTTGATTTCTCGTAAGGTGCCGAGTGGGTCATTAACCAACACCCACCG           |
| 18S-28 | GTTTCAGCCTTGCAGCATACTCCCCCAGAACCCAAAGACTTTGATTC             |
| 18S-29 | AGGCTCCACTCCTGGTGGTGCCTTCCGTCAATTCCTTTAAGTTTCAGCC           |
| 18S-30 | GACCTGGTGAAGTTTCCCGTGTGAGTCAAATTAAGCCGAGGCTCCACT            |
| 18S-31 | CAAGAAAGAGCTCTCAATCTGTCAATCCTTATTGTGTCTGGACCTGGTGA          |
| 18S-32 | CACCAACTAAGAACGGCCATGCACCACCACCCACAAAATCAAGAAAGAGC          |
| 18S-33 | GGTCTCGTTGTTATCGCAATTAAGCAGACAAATCACTCCACCAACTAAG           |
| 18S-34 | GATAACCAGCAAATGCTAGCACCCTATTTAGTAGGTTAAGGTCTCGTTC           |
| 18S-35 | CTTCCATCGGCTTGAAACCGATAGTCCCTCTAAGAAGTGGATAACCAGCA          |
| 18S-36 | GAACGTCTAAGGGCATCACAGACCTGTTATTGCCTCAAACCTCCATCGGC          |
| 18S-37 | GACTCGCTGGTCCGTCAAGTGTAGCGCGCTGCGGCCAGAACGTCTAAG            |
| 18S-38 | GGAGTTTACAAGATTACCAAGACCTCTCGGCCAAGGTTAGACTCGCTGG           |
| 18S-39 | TTGAAGAGCAATAATTACAATGCTCTATCCCAGCACGACGGAGTTTCAC           |
| 18S-40 | CAACGCAAGCTGATGACTTGCCTTACTAGGAATTCCTGTTGAAGAGCA            |
| 18S-41 | ACTAGCGACGGGCGGTGTGTACAAAGGGCAGGGACGTAATCAACGCAAGC          |
| 18S-42 | CTAAGCAGATCCTGAGGCCTCACTAAGCCATTCAATCGGTAAGTAGCGACG         |
| 18S-43 | GTCCAAATTCTCCGCTCTGAGATGGAGTTGCCCTTCTCTAAGCAGATC            |
| 18S-44 | CTTGTACGACTTTTAGTTCTCTAAATGACCAAGTTTGTCCAAATTCTC            |
| 18S-45 | TAATGATCCTTCCGCAGGTTACCTACGGAACCTTGTTACGACTTTTAG            |
| 25S-01 | CCTCCGCTTATTGATATGCTTAAGTTCAGCGGGTACTCCTACCTGATTTGAGGTCAAAC |

|        |                                                               |
|--------|---------------------------------------------------------------|
| 25S-02 | GCTTTTGCCGCTTCACTCGCCGTTACTAAGGCAATCCCGTTGGTTCTTTTCTCCGC      |
| 25S-03 | CCCTCTCAAATTACAACCTCGGGCACCGAAGGTACCAGATTTCAAATTTGAGCTTTTGCC  |
| 25S-04 | CTCTATGACGTCTGTCCAAGGAACATAGACAAGGAACGGCCCAAAGTTGCCCTCTCC     |
| 25S-05 | CGAAGGCACTTTACAAAGAACCGCACTCTCGCCACACGGGATTCTCACCTCTATGACG    |
| 25S-06 | GATGGAATTTACCACCCACTTAGAGCTGCATTCCCAAACAACCTCGACTCTTGAAGGCAC  |
| 25S-07 | CATCACTGTA CTGTTCGCTATCGGTCTCTCGCCAATATTTAGCTTTAGATGGAATTTAC  |
| 25S-08 | CAATTTACGTACTTTTTCACTCTTTTTCAAAGTTCTTTTCATCTTTCCATCACTGTAC    |
| 25S-09 | GAGCAGAGGGGCACAAAACCCATGTCTGATCAAATGCCCTTCCCTTTCAACAATTTACG   |
| 25S-10 | CACCAAACTGATGCTGGCCAGTAAAATGCGAGATTCCCCTACCCACAAGGAGCAGAGG    |
| 25S-11 | GGCTATAATACTTACCGAGGCAAGCTACATTCTATGGATTTATCTGCCACCAAACTG     |
| 25S-12 | CCTTGACTTACGTGCGAGTCTCAGTCCCAGCTGGCAGTATTCCACAGGCTATAATAC     |
| 25S-13 | CCTGGTCCGTGTTTCAAGACGGGCGGCATATAACCATTATGCCAGCATCCTTGACTTAC   |
| 25S-14 | CTTTCATTACGCGTATGGGTTTTACACCCAAACTCGCATAGACGTTAGACTCCTTGGT    |
| 25S-15 | CATCAGGATCGGTGATTGTGCACCTTTGCGAGGCCCAAACCTACGTTCACTTTTATTAC   |
| 25S-16 | CCATCTTTCGGGTCCCAACAGCTATGCTCTTACTCAAATCCATCCGAAGACATCAGGATC  |
| 25S-17 | GAGCCTCCACCAGAGTTTCTCTGGCTTACCCTATTAGGCATAGTTACCATCTTTGCG     |
| 25S-18 | CGCCCTATACCCAAATTCGACGATCGATTTGCAGTCCAGAACCGCTACGAGCCTCCACC   |
| 25S-19 | GAGGGAAACTTCGGCAGGAACAGCTACTAGATGGTTCGATTAGTCTTTGCCCCATAC     |
| 25S-20 | CTAATCATTGCTTTACCTCATAAACTGATACGAGCTTCTGCTATCCTGAGGGAACTTC    |
| 25S-21 | CATATTTAAAGTTTGAGAATAGGTCAAGGTCAATTCGACCCGGAACCTTAATCATTG     |
| 25S-22 | GCTCTCATTCAAATGTCCACGTTCAATTAAGTAACAAGGACTTCTTACATATTTAAAG    |
| 25S-23 | CGGTTTATCCCGCATCGCCAGTTCTGCTTACCAAAAATGGCCCACTAAAAGCTCTTCATTC |
| 25S-24 | CCTTTTGTTGTTGCTGATGAGCGTGTATTCCGGCACCTTAACTCTACGTTTCGGTTCATCC |
| 25S-25 | GCGGATTCGACTTCCATGGCCACCGTCCGGCTGTCTAGATGAACTAACCTTTTGTGG     |
| 25S-26 | CCATTTTCAGGGCTAGTTCAATTCGGCCGGTGAGTTGTACACACTCCTTAGCGGATTCCG  |
| 25S-27 | CATCATATCAACCCTGACGGTAGAGTATAGGTAACACGCTTGAGCGCCATCCATTTTACG  |
| 25S-28 | CTTACGGTCTAGGCTTCTGCTACTGACCTCCACGCTGCCTACTCGTCAGGGCATCATATC  |
| 25S-29 | GAATATTTGCTACTACCACCAAGATCTGCACTAGAGGCCGTTTCGACCCGACCTTACGGTC |
| 25S-30 | CTGCTGTTGACGTGGAACCTTTCCCACTTCAAGTTCTCATTGAAATATTTGC          |
| 25S-31 | CTTTGAAACGGAGCTTCCCATCTCTTAGGATCGACTAACCACGTCCAAGTCTGTTGAC    |
| 25S-32 | CGGAATCTTAAACGGATTCCCTTTCGATGGTGGCTGCATAAAATCAGGCCTTTGAAACG   |
| 25S-33 | CGTCTCCACATTACGTTACGTTACCGTGAAGAATCCATATCCAGGTTCCGGAATCTTAAAC |
| 25S-34 | GGTGATAAGCTGTTAAGAAGAAAAGATAACTCCTCCAGGGCTCGCGCCGACGCTCCAC    |
| 25S-35 | GTGCTGGCCTCTCCAGCCATAAGACCCATCTCCGGATAAACCAATTCGGGGTGATAAG    |
| 25S-36 | CTTCTGTGGATTTTACGGGCCGTACAAGCGCACCGGAGCCAGCAAAGGTGCTGGCCTC    |
| 25S-37 | CCTTGGAGACCTGCTGCGGTTATCAGTACGACCTGGCATGAAAATCTTCTTCTGTGG     |
| 25S-38 | GCCGACTTCCCTTATCTACATTATTCTATCAACTAGAGGCTGTTACCTTGAGACC       |
| 25S-39 | CTACCCGACCTTAGAGCCAATCCTTATCCCGAAGTTACGGATCTATTTGCCGACTTCC    |
| 25S-40 | CCCACCAAGCAGTCCACAAGCACGCCGCTGCGTCTGACCAAGGCCCTCACTACCCGACC   |
| 25S-41 | CAAGGCCGTCTACAACAAGGCACGCAAGTAGTCCGCCTAGCAGAGCAAGCCCCACCAAGC  |
| 25S-42 | GTTCTAAGTTGATCGTTAATTGTAGCAAGCGACGGTCTACAAGAGACCTACCAAGGCCGT  |
| 25S-43 | CGCAATGCTATGTTTTAATTAGACAGTCAAGTCCCTTGTCCGTACCAGTTCTAAGTTG    |
| 25S-44 | CAGAGCACTGGGCAGAAATCACATTGCGTCAACATCACTTTCTGACCATCGCAATGCTATG |
| 25S-45 | GTTACTCCCGCCGTTTACCCGCGCTTGGTTGAATTTCTCACTTTGACATTCAGAGCACTG  |
| 25S-46 | GCGCGTCACTAATTAGATGACGAGGCATTTGGCTACCTAAGAGAGTCATAGTTACTCCC   |
| 25S-47 | GTTTCGCTAGATAGTAGATAGGGACAGTGGGAATCTCGTTAATCCATTCATGCGGTCAC   |
| 25S-48 | CAGGGTCTTCTTCCCGCTGATTCTGCCAAGCCGTTCCCTTGGCTGTGGTTTCGCTAG     |
| 25S-49 | GAAGACCCTGTTGAGCTTACTCTAGTTTACATTGTGAAGAGACATAGAGGGTGTAG      |

|            |                                                               |
|------------|---------------------------------------------------------------|
| 25S-50     | GAAACTATAAAGGTAGTGGTATTTCACTGGCGCCGAAGCTCCCACTTATTCTACACCCTC  |
| 25S-51     | CTAGAACGTGGAAAATGAATTCAGCTCCGCTTCATTGAATAAGTAAAGAACTATAAAG    |
| 25S-52     | CCACCTGACAATGTCTCAACCCGGATCAGCCCCGAATGGGACCTTGAATGCTAGAACGTG  |
| 25S-53     | CTTAGGACATCTGCGTTATCGTTTAAACAGATGTGCCGCCAGCCAAACTCCCCACCTGAC  |
| 25S-54     | GCTTTTACCCTTTTGTCTACTGGAGATTTCTGTTCTCCATGAGCCCCCTTAGGACATC    |
| 25S-55     | GGCCACACTTTCATGGTTTGTATTCACACTGAAAATCAAATCAAGGGGGCTTTTACCC    |
| 25S-56     | GTAACTTTTCTGGCACCTCTAGCCTCAAATTCGAGGGACTAAAGGATCGATAGGCCACAC  |
| 25S-57     | GCAATGTCGCTATGAACGCTTGACTGCCACAAGCCAGTTATCCCTGTGGTAACTTTTCTG  |
| 25S-58     | CGAATTCTGCTTCGGTATGATAGGAAGAGCCGACATCGAAGAATCAAAAAGCAATGTCGC  |
| 25S-59     | CCCAGCTCAGTTCCTATTAGTGGGTGAACAATCCAACGCTTACCGAATTCTGCTTCGG    |
| 25S-60     | GGTAACATTCATCAGTAGGGTAAACTAACCTGTCTCACGACGGTCTAAACCCAGCTCAC   |
| 25S-61     | CAATTATCCGAATGAACTGTTCTCTCGTACTAAGTTCAATTACTATTGCGGTAACATTC   |
| 25S-62     | CCAGCGGATGGTAGCTTCGCGGCAATGCCTGATCAGACAGCCGCAAAAACCAATTATCCG  |
| 25S-63     | GAAATCACCGCTTCTAGCATGGATTCTGACTTAGAGGCGTTCAGCCATAATCCAGCGGATG |
| 25S-64     | GACGCCACAAGGACGCCTTATTCGTATCCATCTATATTGTGTGGAGCAAAGAAATCACCG  |
| 25S-65     | CCCAAGGCCTTCCGCCAAGTGACCGTTGCTAGCCTGCTATGGTTCAGCGACGCCACAAG   |
| 25S-66     | CAAATGATTTATCCCCACGAAAATGACATTGCAATTCGCCAGCAAGCACCCAAGGCC     |
| 25S-67     | CAAGGCTACTCTACTGCTTACAATACCCCGTTGTACATCTAAGTCGTATACAAATG      |
| 25S-68     | ACAAATCAGACAACAAAGGCTTAATCTCAGCAGATCGTAACAACAAGGCTACTCTACTGC  |
| 18S-561    | CAGACTTGCCCTCCAATTGTTCTCGTTAAGGTATTTACATTGTAICTCAT            |
| 18S-562    | ACAACCTTAATATACGCTATTGGAGCTGGAATTACCGCGGCTGCTGGCAC            |
| 25S-2791   | CTAGCCTCAAATTCGAGGGACTAAAGGATCGATAGGCCACACTTTCATG             |
| 25S-2793   | GAACGCTTGACTGCCACAAGCCAGTTATCCCTGTGGTAACTTTTCTGGCACC          |
| 25S-2265   | CATTCATGCGCGTCACTAATTAGATGACGAGGCATTTGGCTACCTTAAGAG           |
| 18S-11a    | CCTGCTGCCTTCTTGATGTGGTAGCCGTTTCTCAGGCTCCCTCTCCGG              |
| 18S-11b    | CGTTATTTATTGCTACTACCTCCCTGAATTAGGATTGGGTAATTTGCGCGC           |
| 25S-60a    | CGGTAACATTCATCAGTAGGGTAAAATAACCTGTCTCACGACGGTCTAAAC           |
| Oligo- 491 | TCCTCGTTAAGGTATTTACATTGTAICTATTCCAATTACAAGACCCGAATG           |
| Oligo-542  | GAGCTGGAATTACCGCGGCTGCTGGCACCAGACTTGCCCTCCAATTGT              |
